# Supplementary material for: Metabolic imaging across scales reveals distinct prostate cancer phenotypes
Source: bioRxiv or medRxiv preprint supplement (doi:10.1101/2023.09.29.23296228), 2023-10-02
Supplement: Supplementary file [file media-1.pdf]

## **Metabolic imaging across scales reveals distinct prostate cancer phenotypes**

Nikita Sushentsev<sup>1†\*</sup>, Gregory Hamm<sup>2†</sup>, Lucy Flint<sup>2</sup>, Daniel Birtles<sup>2</sup>, Aleksandr Zakirov<sup>3</sup>, Jack Richings<sup>2</sup>, Stephanie Ling<sup>2</sup>, Jennifer Y. Tan<sup>2</sup>, Mary A. McLean<sup>1,4</sup>, Vinay Ayyappan<sup>1</sup>, Ines Horvat Menih<sup>1</sup>, Cara Brodie<sup>4</sup>, Jodi L. Miller<sup>4</sup>, Ian G. Mills<sup>5,6,7,8</sup>, Vincent J. Gnanapragasam<sup>9, 10,11</sup>, Anne Y. Warren<sup>12</sup>, Simon T. Barry<sup>13</sup>, Richard J.A. Goodwin<sup>2††</sup>, Tristan Barrett<sup>1††</sup>, Ferdia A. Gallagher<sup>1††</sup>

<sup>1</sup> Department of Radiology, Addenbrooke's Hospital and University of Cambridge, Cambridge, UK

<sup>2</sup> Imaging and Data Analytics, Clinical Pharmacology & Safety Sciences, R&D, AstraZeneca, Cambridge, UK

<sup>3</sup> Department of Clinical Neurosciences, University of Cambridge, Cambridge, UK

<sup>4</sup> Cancer Research UK Cambridge Institute, University of Cambridge, Cambridge, UK

<sup>5</sup> Patrick G Johnston Centre for Cancer Research, Queen's University Belfast, Belfast, UK

<sup>6</sup> Nuffield Department of Surgical Sciences, University of Oxford, John Radcliffe Hospital, Oxford, UK

<sup>7</sup> Centre for Cancer Biomarkers, University of Bergen, Bergen, Norway

<sup>8</sup> Department of Clinical Science, University of Bergen, Bergen, Norway

<sup>9</sup> Department of Urology, Cambridge University Hospitals NHS Foundation Trust, Cambridge, UK

<sup>10</sup> Division of Urology, Department of Surgery, University of Cambridge, Cambridge, UK

<sup>11</sup> Cambridge Urology Translational Research and Clinical Trials Office, Cambridge Biomedical Campus, Addenbrooke's Hospital, Cambridge, UK

<sup>12</sup> Department of Pathology, Cambridge University Hospitals NHS Foundation Trust, Cambridge, UK

<sup>13</sup> Bioscience, Discovery, Oncology R&D, AstraZeneca, Cambridge, UK

† These authors contributed equally

†† These authors jointly supervised the work

\*Corresponding author. Email: [ns784@medschl.cam.ac.uk](mailto:ns784@medschl.cam.ac.uk)

### **Supplementary Information file including:**

Supplementary Table 1

Extended Data Figures 1-6

| exp_peak | interval_width_da   | compound_name             |
|----------|---------------------|---------------------------|
| 87.0088  | 0.00051129959854279 | Pyruvate                  |
| 89.0246  | 0.00052314529990838 | Lactate                   |
| 103.0036 | 0.00060529199649295 | Malonate                  |
| 112.9877 | 0.00066396247220268 | Oxaloacetate              |
| 115.0035 | 0.0006758082859335  | Fumarate                  |
| 117.0194 | 0.00068765446259533 | Succinate                 |
| 125.0972 | 0.00073512268198073 | Octanoic acid             |
| 131.0351 | 0.00077001646214114 | Glutarate                 |
| 133.0145 | 0.00078164818512505 | Malate                    |
| 145.0144 | 0.00085216473715377 | alpha-Ketoglutarate       |
| 152.9962 | 0.00089906909218485 | Succinate                 |
| 153.1287 | 0.0008998474800137  | Decanoic acid             |
| 166.9755 | 0.00098121705471499 | Phosphoenolpyruvate       |
| 173.0093 | 0.0010166739553483  | cis-Aconitate;Citrate     |
| 179.0561 | 0.001052207884598   | Glucose                   |
| 189.004  | 0.0011106654522308  | Oxalosuccinate            |
| 191.02   | 0.001122512497858   | Citrate                   |
| 208.9846 | 0.0025771426214618  | cis-Aconitate             |
| 215.0325 | 0.0012636201084888  | Glucose                   |
| 224.9801 | 0.001322076059239   | Oxalosuccinate            |
| 227.2014 | 0.0013351295196173  | Tetradecanoic acid        |
| 241.012  | 0.0014162866034297  | Glucose 1-phosphate       |
| 246.9398 | 0.0014511207514829  | Glycerate 1,3-biphosphate |
| 253.2173 | 0.0014880098153043  | Palmitoleic acid          |
| 281.2482 | 0.0016527310219772  | Oleic acid                |
| 283.2654 | 0.0016645846906727  | Octadecanoic acid         |
| 284.056  | 0.0016692306908794  | S-Acetyldihydroipoamide-E |
| 291.2099 | 0.0017112699781592  | Hexadecanoic acid         |
| 317.2244 | 0.0018641420160179  | Oleic acid                |
| 319.2406 | 0.0018759897287168  | Octadecanoic acid         |
| 398.3282 | 0.0023407415183669  | L-Palmitoylcarnitine      |

**Supplementary Table 1.** The list of KEGG glycolysis, TCA cycle, and fatty acid biosynthesis metabolites used for DESI-MSI-derived metabolic pathway enrichment analysis in the secondary cohort.
